# Supplementary material for: Contrasting Microbiome Dynamics of Putative Denitrifying Bacteria in Two Octocoral Species Exposed to Dissolved Organic Carbon (DOC) and Warming
Source: PubMed Central journal article supplement (PMC8788706; doi:10.1128/aem.01886-21), 2022-01-25
Supplement: aem.01886-21-s0001.pdf [file aem.01886-21-s0001.pdf]

## Supporting Figure legends

**Fig. S1** Rarefaction curves of bacterial communities in corals *X. umbellata* and *P. flava*. (a) ASV numbers with sequencing depth of 200,000 in *X. umbellata* and ASV numbers with sequencing depth of 80,000 in *P. flava*. (b) ASV numbers at the minimum library size with sequencing depth of 3,000 in corals *X. umbellata* and *P. flava*.

**Fig. S2** Alpha diversity of bacterial communities at the minimum library size with sequencing depth of 3,000 in corals *X. umbellata* and *P. flava*. The asterisks indicate statistically significant differences compared to day 0 for each species separately (\* $p < 0.05$ ; \*\* $p < 0.01$ ; \*\*\* $p < 0.001$ ). (a) Chao1 index. (b) Inverse Simpson Index. (c) ACE index. (d) Shannon diversity index.

**Fig. S3** Multivariate dispersion of bacterial communities in corals *X. umbellata* and *P. flava*. The asterisks indicate statistically significant differences between groups (\* $p < 0.05$ ; \*\* $p < 0.01$ ; \*\*\* $p < 0.001$ ).

**Fig. S4** The fluctuations in salinity (daily measurement) throughout the experiment. Values are shown by means  $\pm$  SE for different treatments: (a) control; (b) low DOC (10 mg L<sup>-1</sup>); (c) medium DOC (20 mg L<sup>-1</sup>); (d) high DOC (40 mg L<sup>-1</sup>).

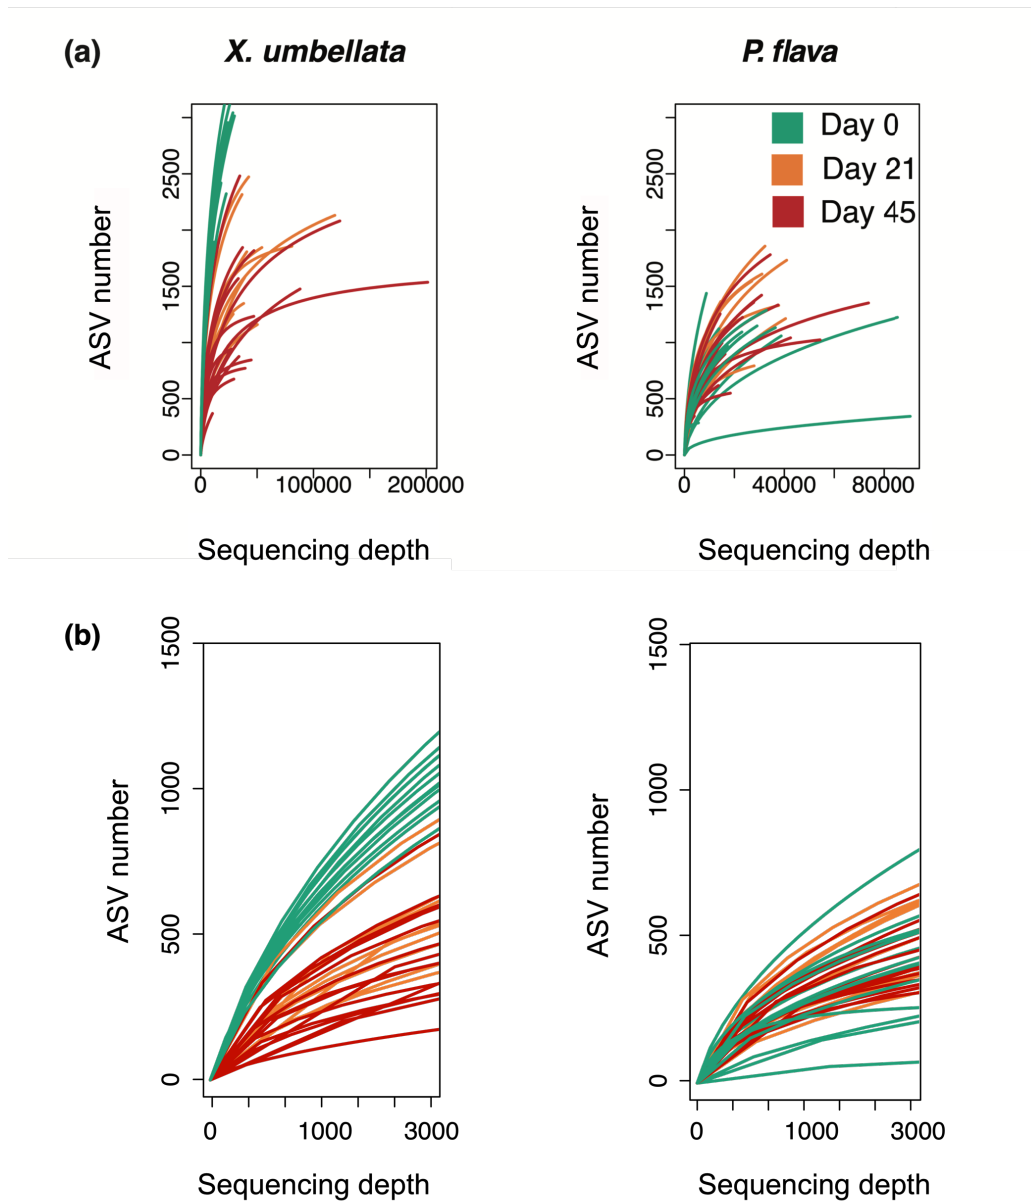

**Fig. S1** Rarefaction curves of bacterial communities in corals *X. umbellata* and *P. flava*. (a) ASV numbers in *X. umbellata* with sequencing depth of 200,000 and in *P. flava* with sequencing depth of 80,000. (b) ASV numbers in corals *X. umbellata* and *P. flava* with sequencing depth of 3,000.

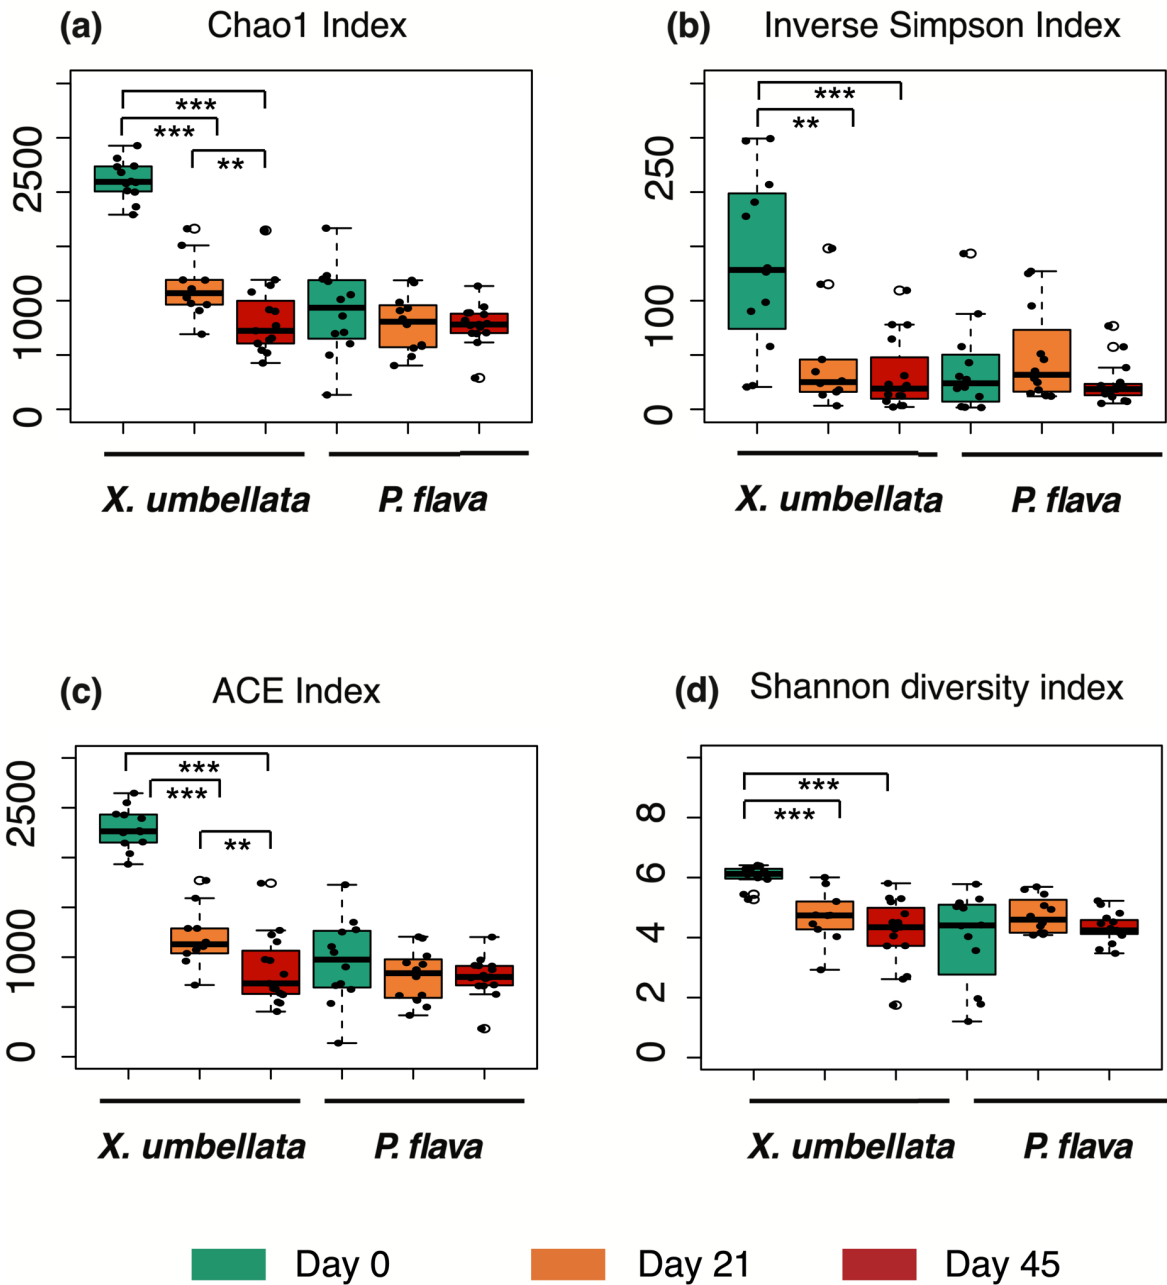

**Fig. S2** Alpha diversity of bacterial communities in corals *X. umbellata* and *P. flava*. The asterisks indicate statistically significant differences compared to day 0 for each species separately (\* $p < 0.05$ ; \*\* $p < 0.01$ ; \*\*\* $p < 0.001$ ). (a) Chao1 index. (b) Inverse Simpson Index. (c) ACE index. (d) Shannon diversity index.

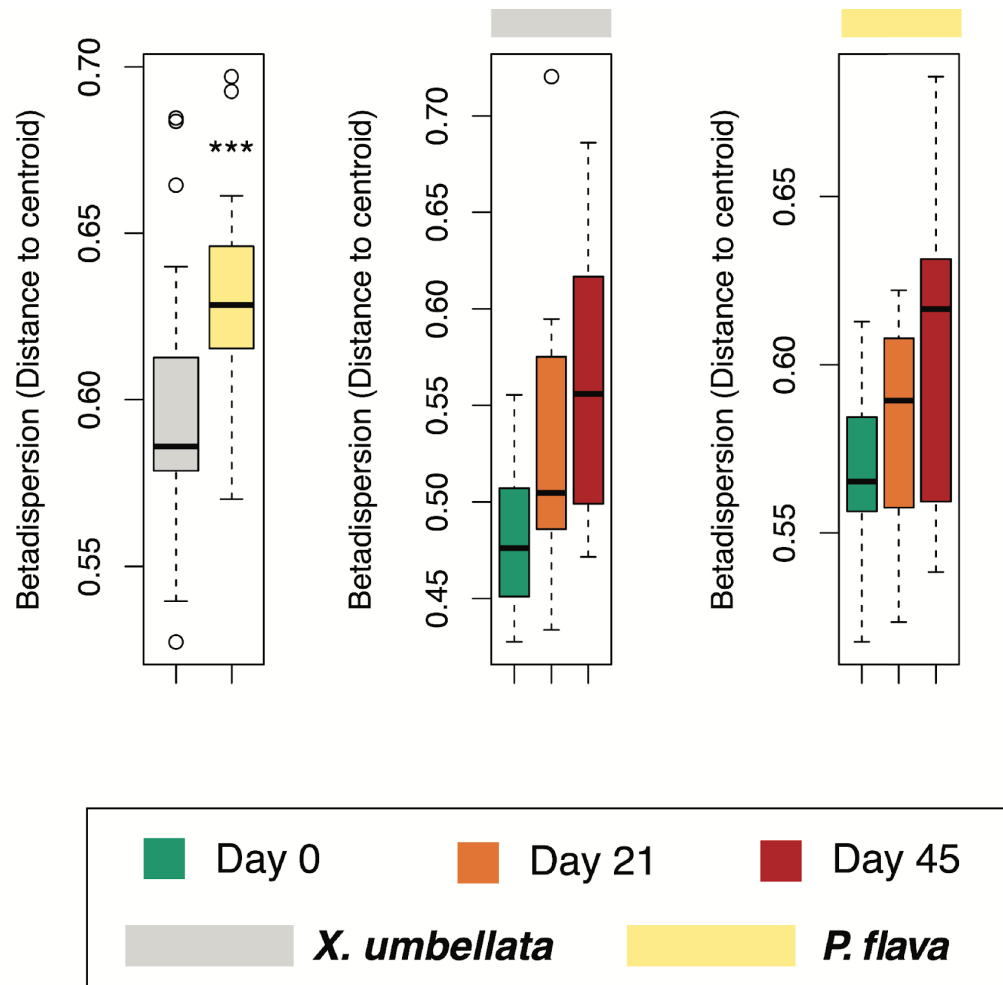

**Fig. S3** Multivariate dispersion of bacterial communities in corals *X. umbellata* and *P. flava*. The asterisks indicate statistically significant differences between groups ( $*p < 0.05$ ;  $**p < 0.01$ ;  $***p < 0.001$ ).

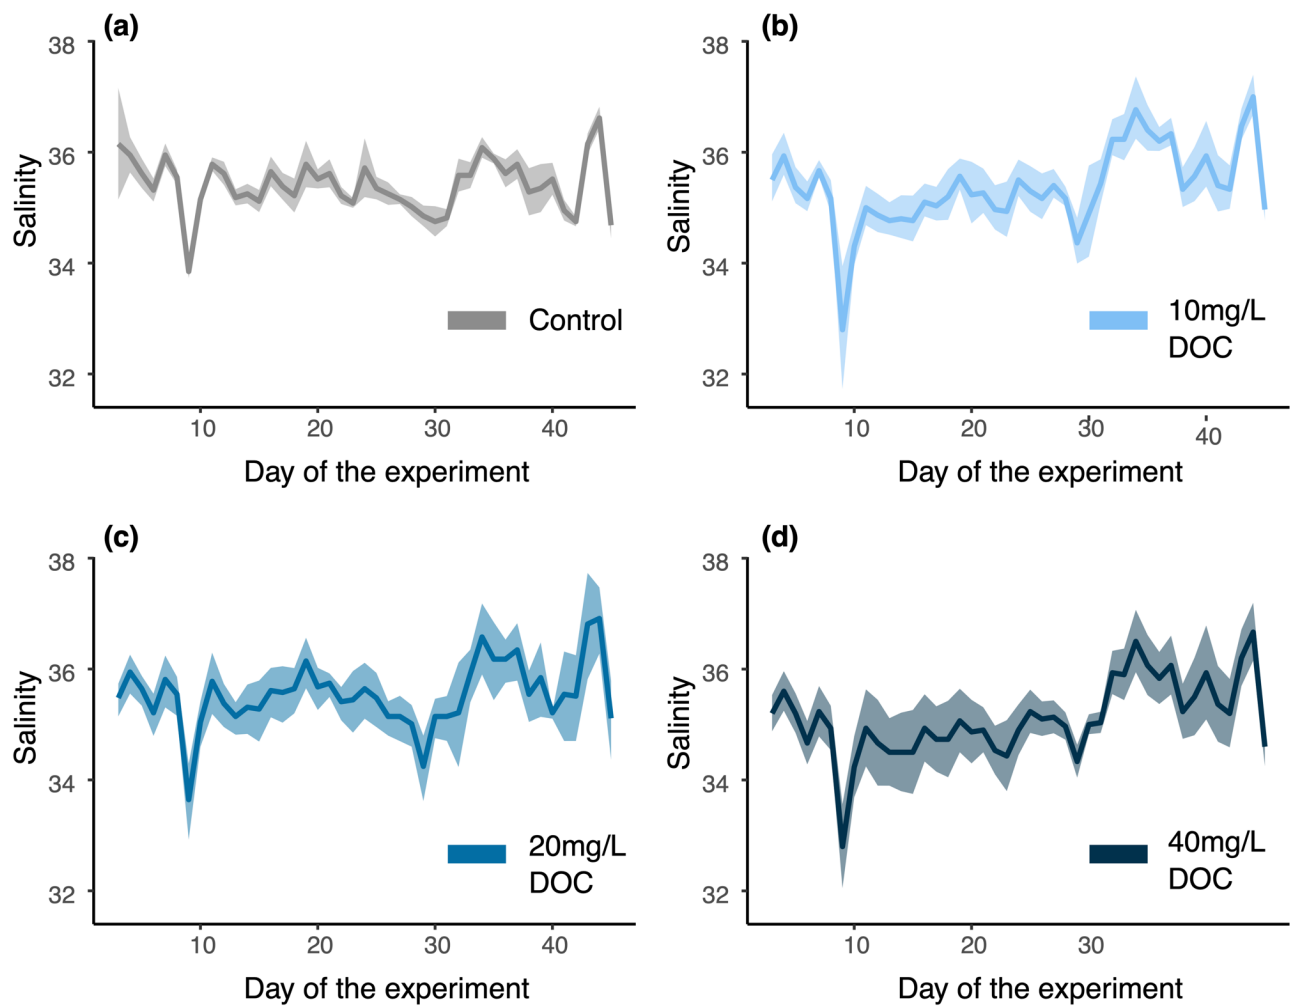

**Fig. S4** The fluctuations in salinity (daily measurement) throughout the experiment. Values are shown by means  $\pm$  SE for different treatments: (a) control; (b) low DOC (10 mg L<sup>-1</sup>); (c) medium DOC (20 mg L<sup>-1</sup>); (d) high DOC (40 mg L<sup>-1</sup>).
